# Supplementary material for: HIV-1 capsid undergoes coupled binding and isomerization by the nuclear pore protein NUP358
Source: PubMed Central journal article supplement (PMC3750474; doi:10.1186/1742-4690-10-81), 2013-07-31
Supplement: 1742-4690-10-81-S1.pdf [file 1742-4690-10-81-S1.pdf]

## Additional File 1. Data collection and refinement statistics

| NUP358Cyp:HIV-1 CA <sup>N</sup>                     |                    |
|-----------------------------------------------------|--------------------|
| <b>Data collection</b>                              |                    |
| Space group                                         | C2                 |
| Cell dimensions                                     |                    |
| <i>a</i> , <i>b</i> , <i>c</i> (Å)                  | 142.2, 38.3, 123.8 |
| $\alpha$ , $\beta$ , $\gamma$ (°)                   | 90.0, 100.6, 90.0  |
| Resolution (Å)                                      | 33 – 1.95          |
| <i>R</i> <sub>sym</sub>                             | 0.126 (0.448)*     |
| <i>I</i> / $\sigma$ <i>I</i>                        | 7.6 (2.2)          |
| Completeness (%)                                    | 94.5 (94.5)        |
| Redundancy                                          | 3.2 (3.2)          |
| <b>Refinement</b>                                   |                    |
| Resolution (Å)                                      | 1.95               |
| No. reflections                                     | 48,326             |
| <i>R</i> <sub>work</sub> / <i>R</i> <sub>free</sub> | 0.205/0.243        |
| No. atoms                                           |                    |
| Protein                                             | 9,862              |
| Ligand/ion                                          | 0                  |
| Water                                               | 380                |
| <i>B</i> -factors                                   |                    |
| Protein                                             | 17.0               |
| Ligand/ion                                          | n/a                |
| Water                                               | 28.7               |
| R.m.s deviations                                    |                    |
| Bond lengths (Å)                                    | 0.004              |
| Bond angles (°)                                     | 0.8                |

\*Values in parentheses are for highest-resolution shell.
