# Supplementary material for: HIV-1 capsid undergoes coupled binding and isomerization by the nuclear pore protein NUP358
Source: PubMed Central journal article supplement (PMC3750474; doi:10.1186/1742-4690-10-81), 2013-07-31

NUP358Cyp

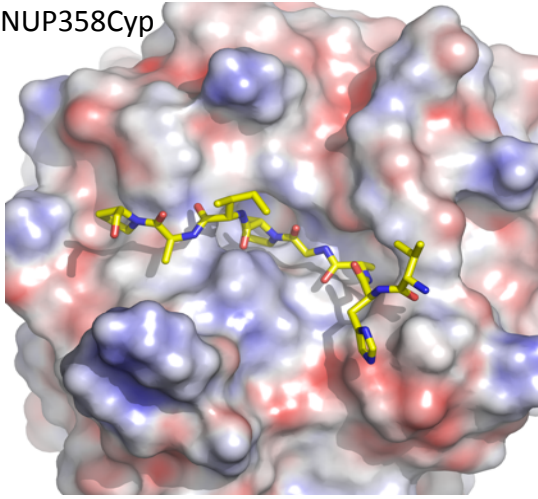

CypA

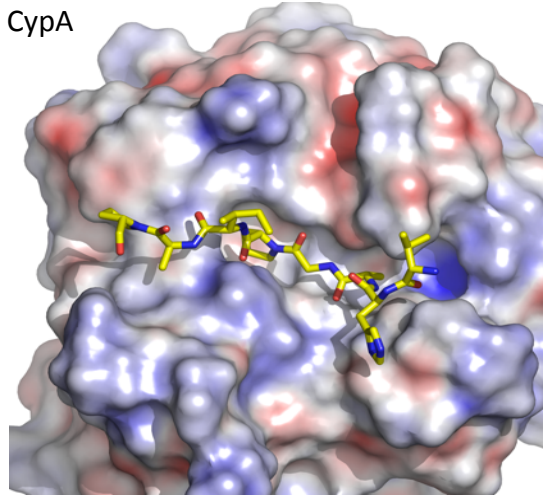

Supplement: 1742-4690-10-81-S2.pdf [file 1742-4690-10-81-S2.pdf]
